# Supplementary material for: Ketogenic diet containing medium-chain triglyceride ameliorates transcriptome disruption in skeletal muscles of rat models of duchenne muscular dystrophy
Source: PubMed Central journal article supplement — Biochem Biophys Rep. 2022 Nov 11;32:101378. doi: 10.1016/j.bbrep.2022.101378 (PMC9661647; doi:10.1016/j.bbrep.2022.101378), 2022-11-11

# Supplementary Figure 1

A

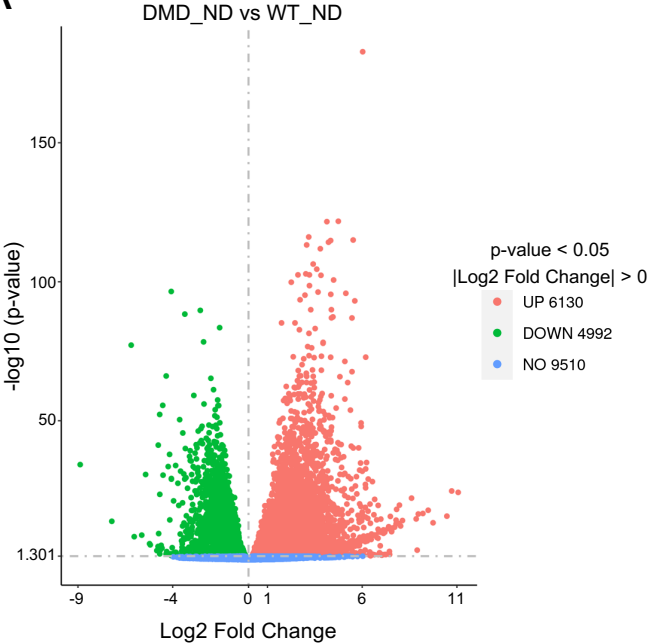

B

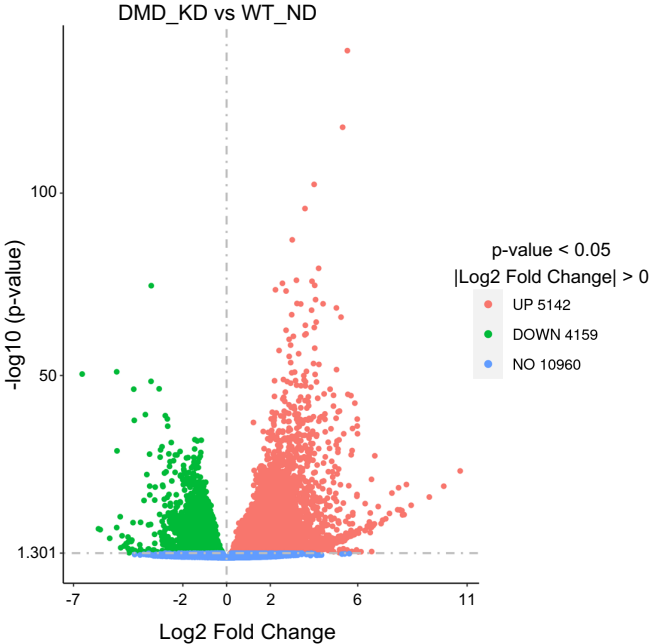

# Supplementary Figure 2

## A

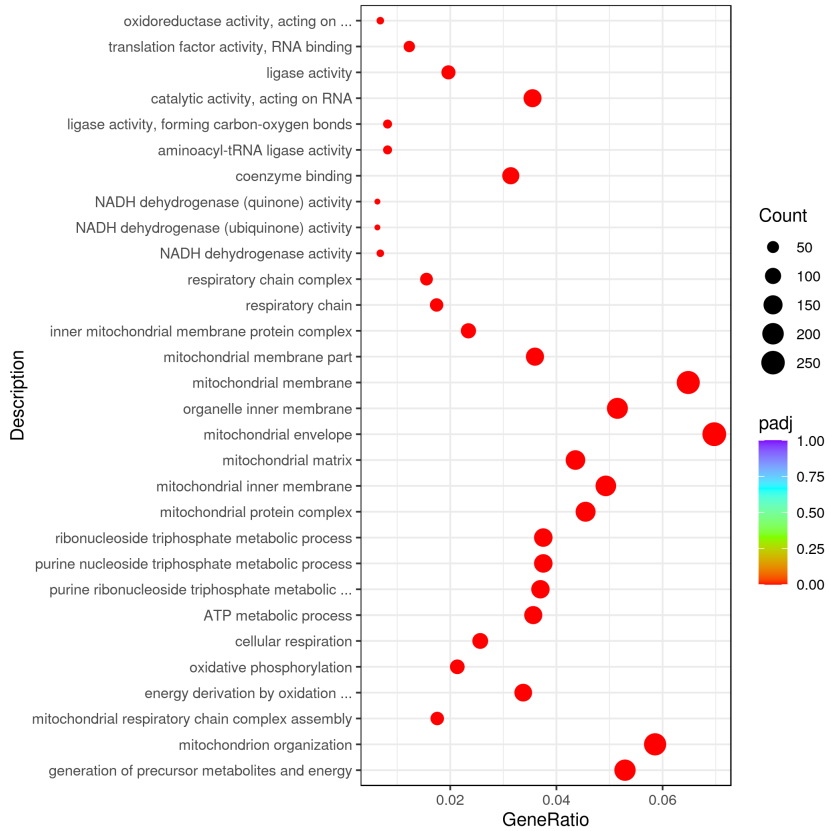

## B

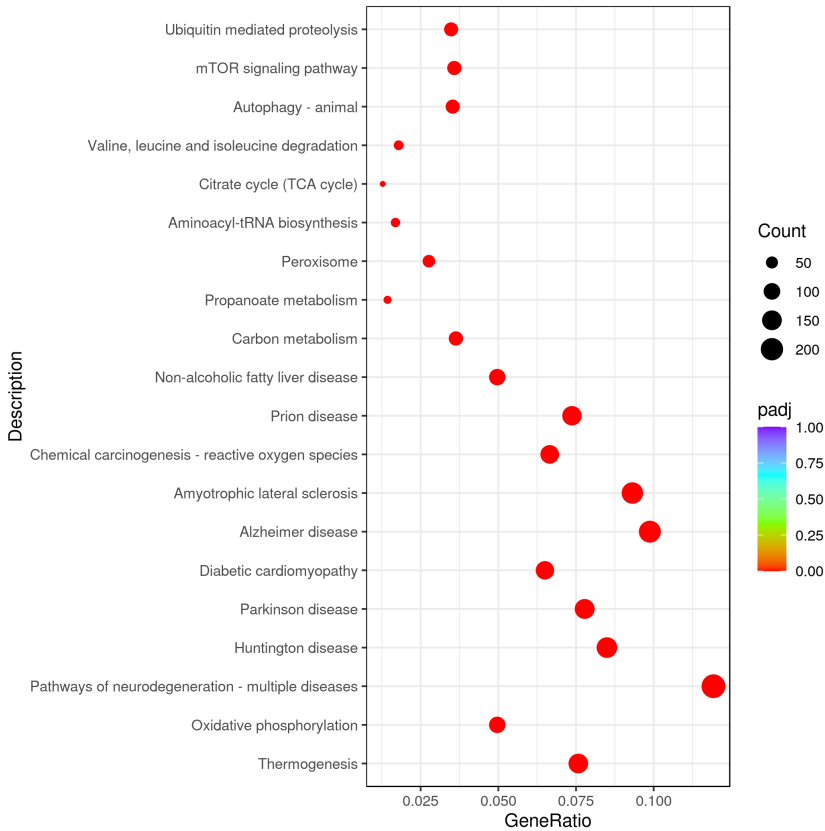

# Supplementary Figure 3

## A

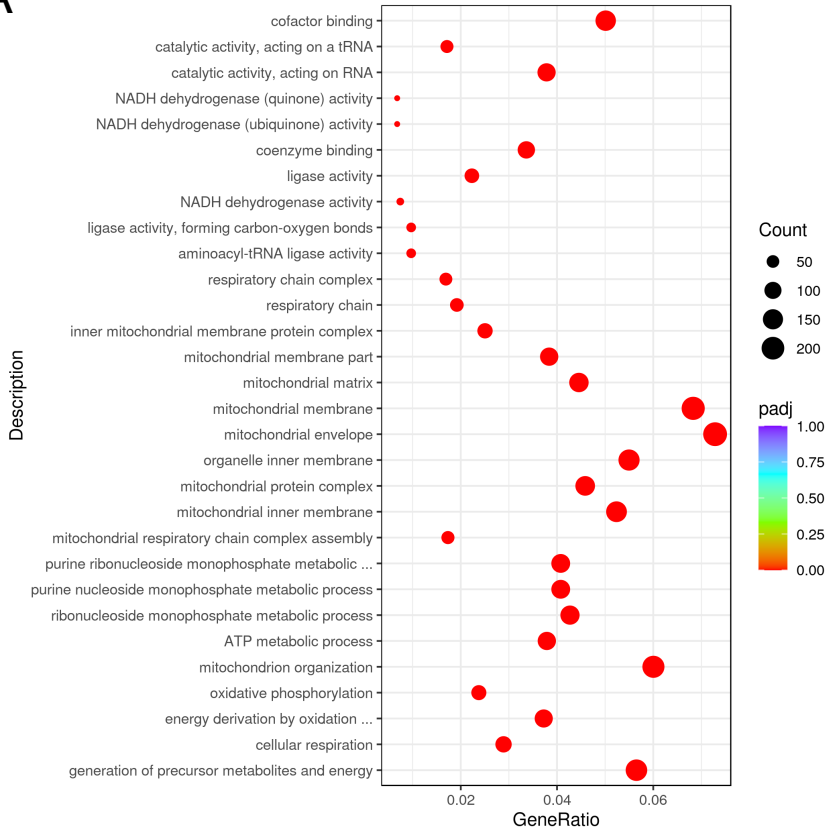

## B

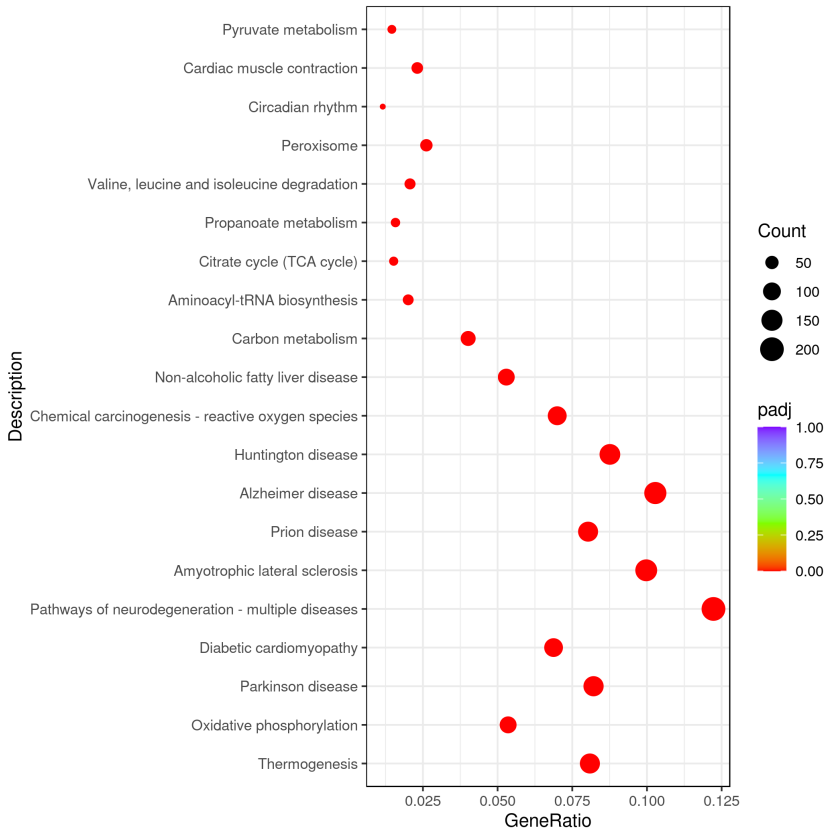

# Supplementary Figure 4

## A

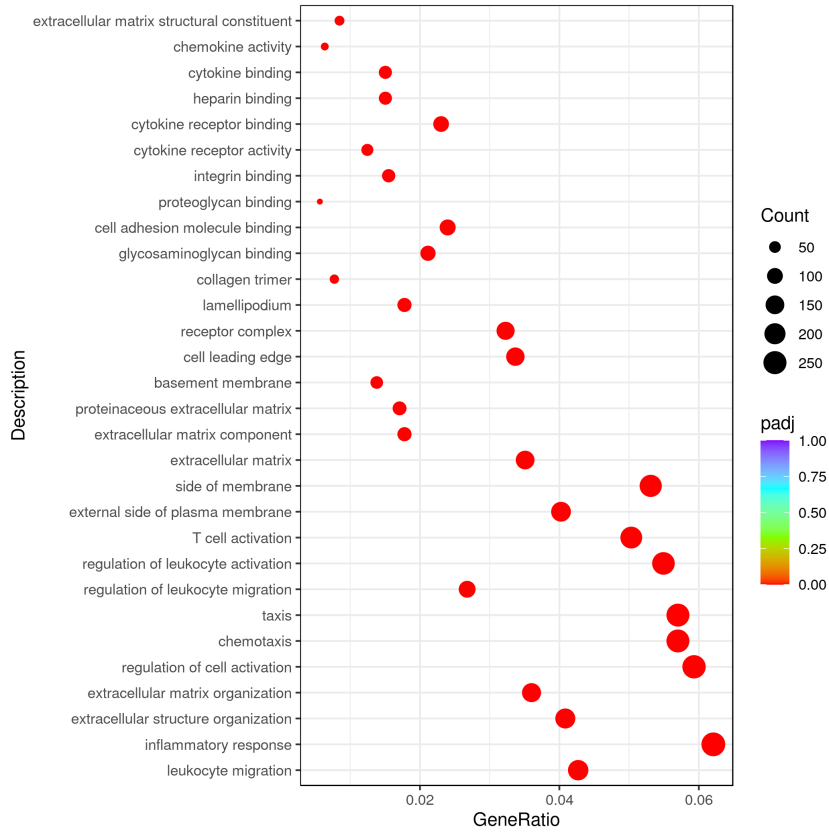

## B

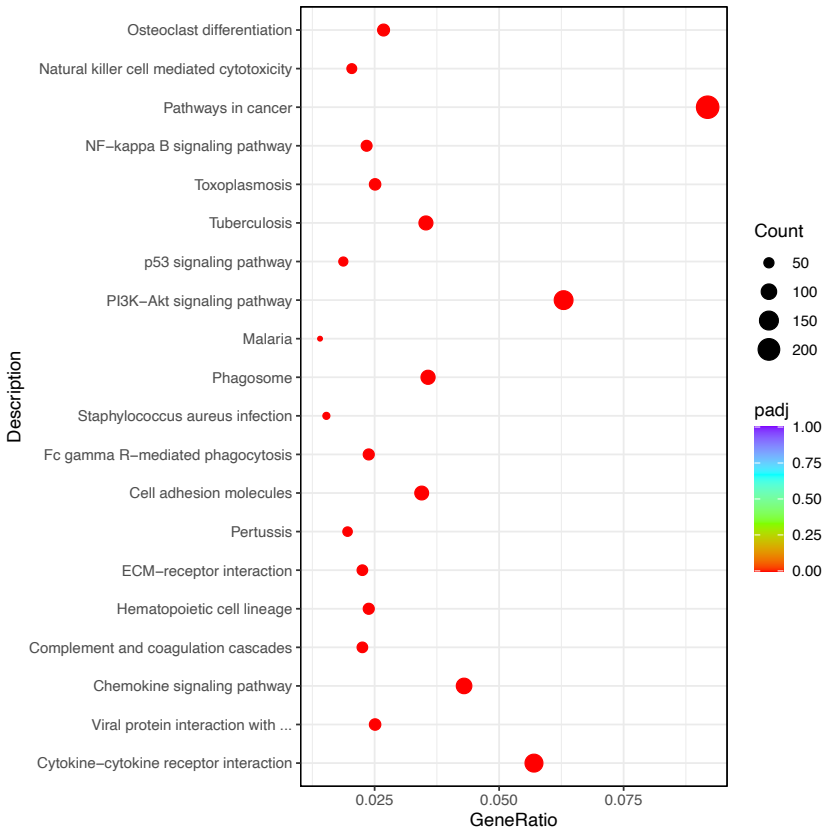

# Supplementary Figure 5

A

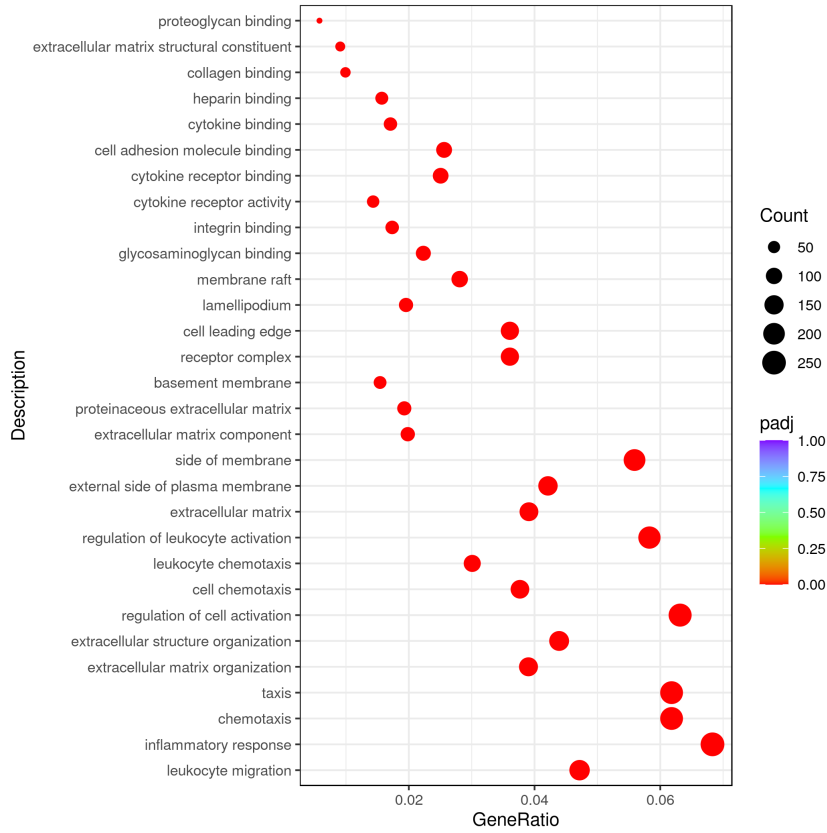

B

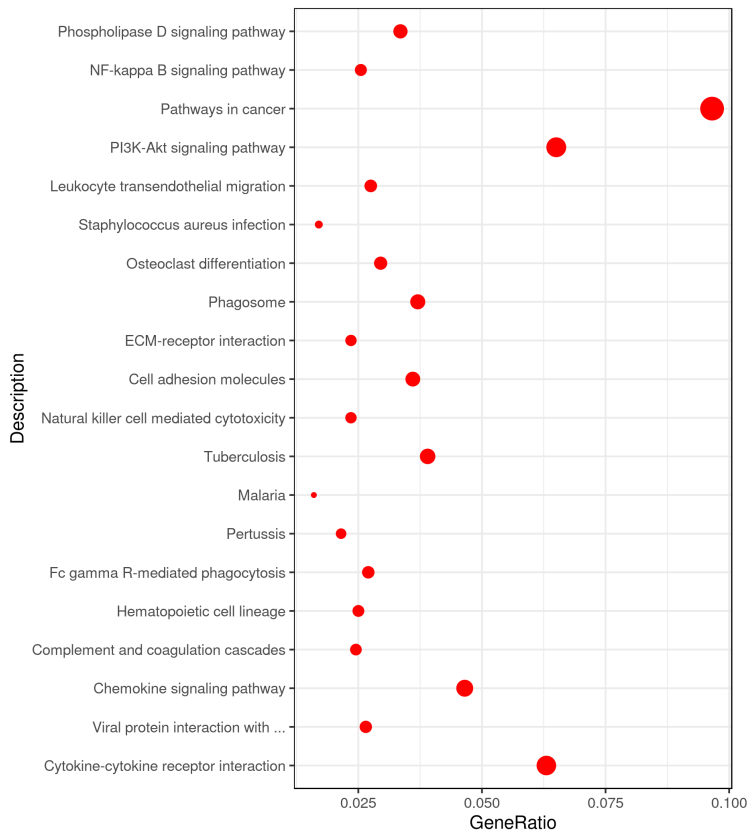

# Supplementary Figure 6

**A**

*Slh* mRNA expression

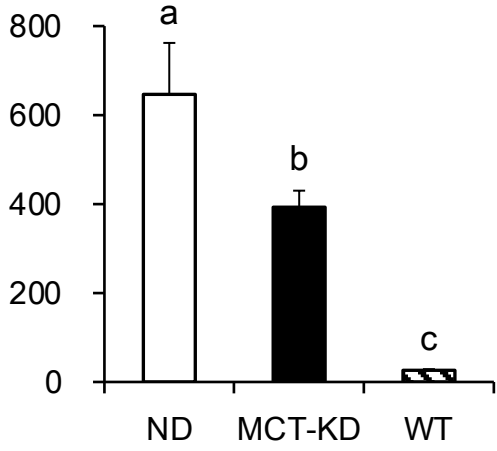

**B**

*Ryr1* mRNA expression

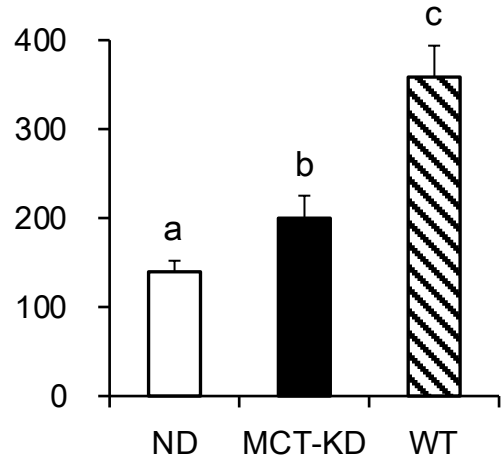

**C**

*Atp2a1* mRNA expression

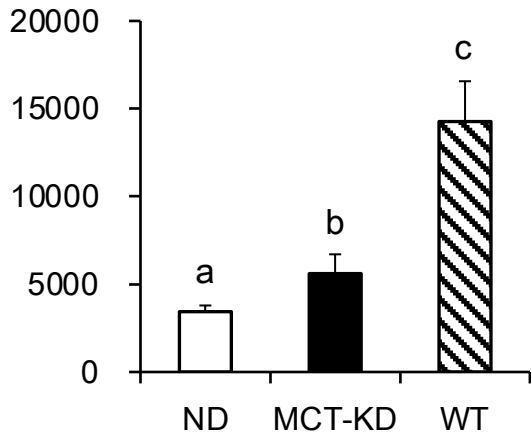

**D**

*Atp2a2* mRNA expression

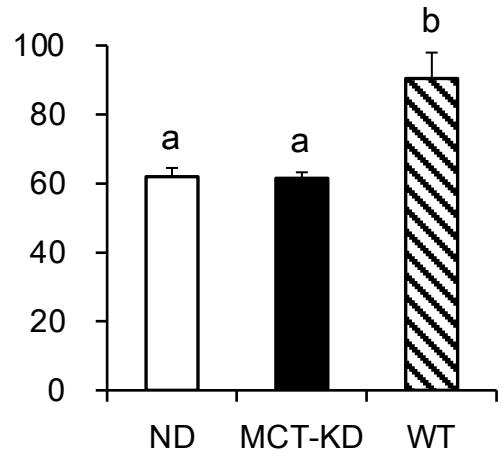

# Supplementary Figure 7

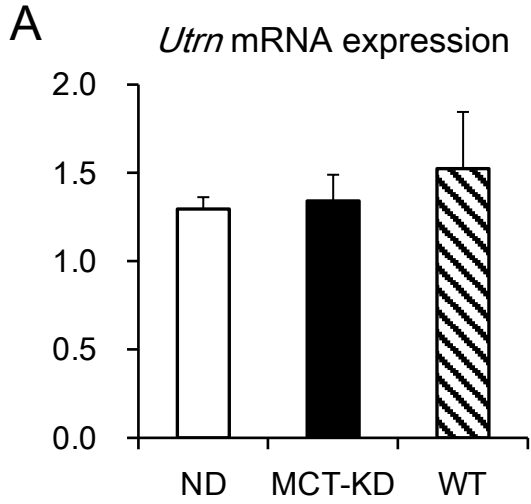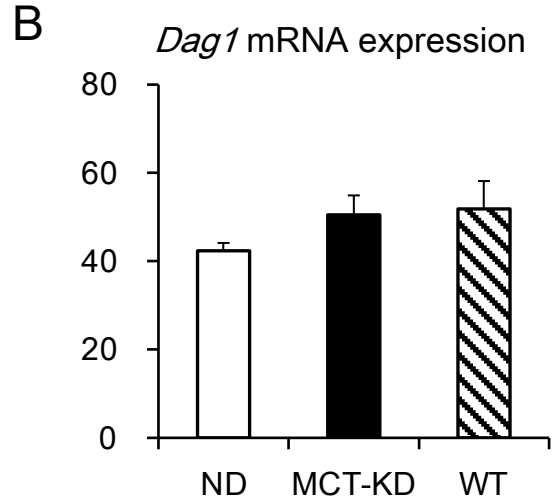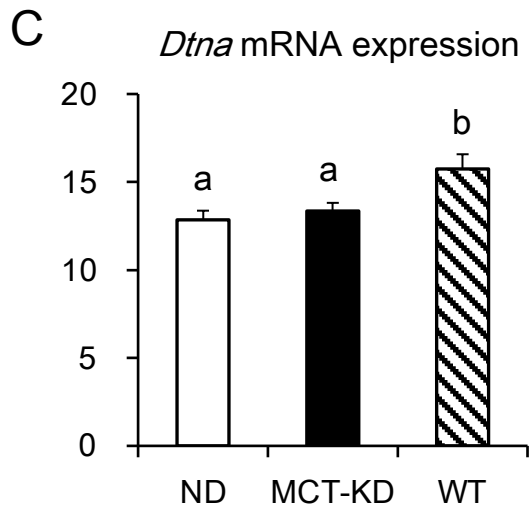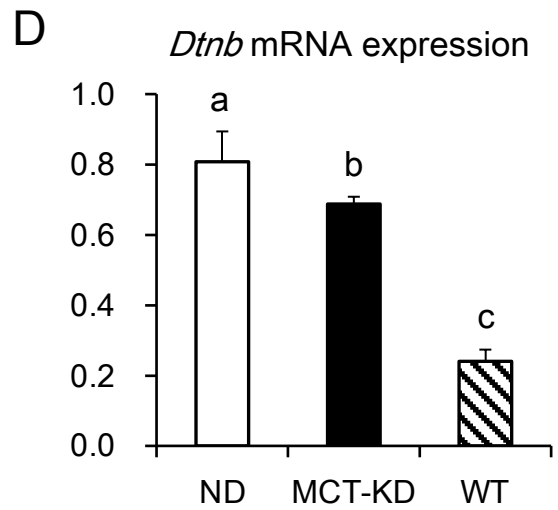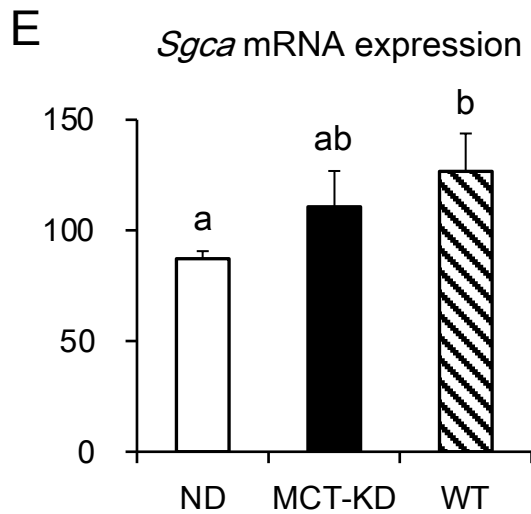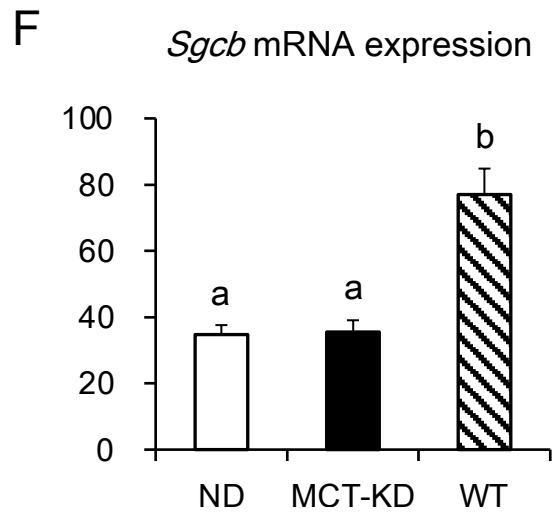

# Supplementary Figure 7

## G

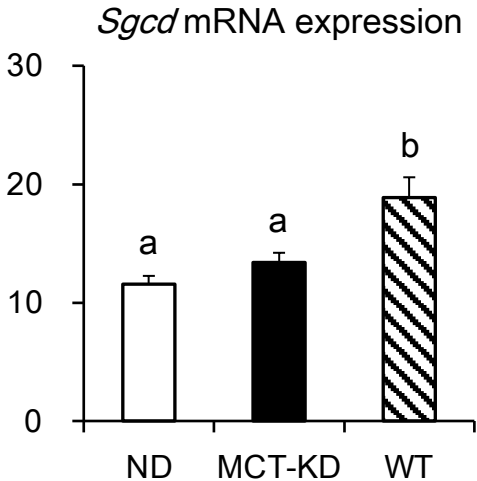

## H

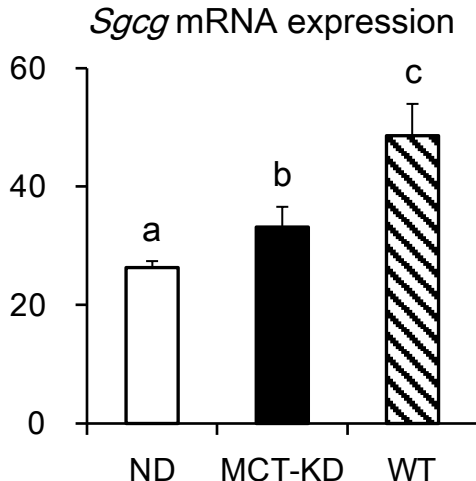



# Supplementary Figure 8

A

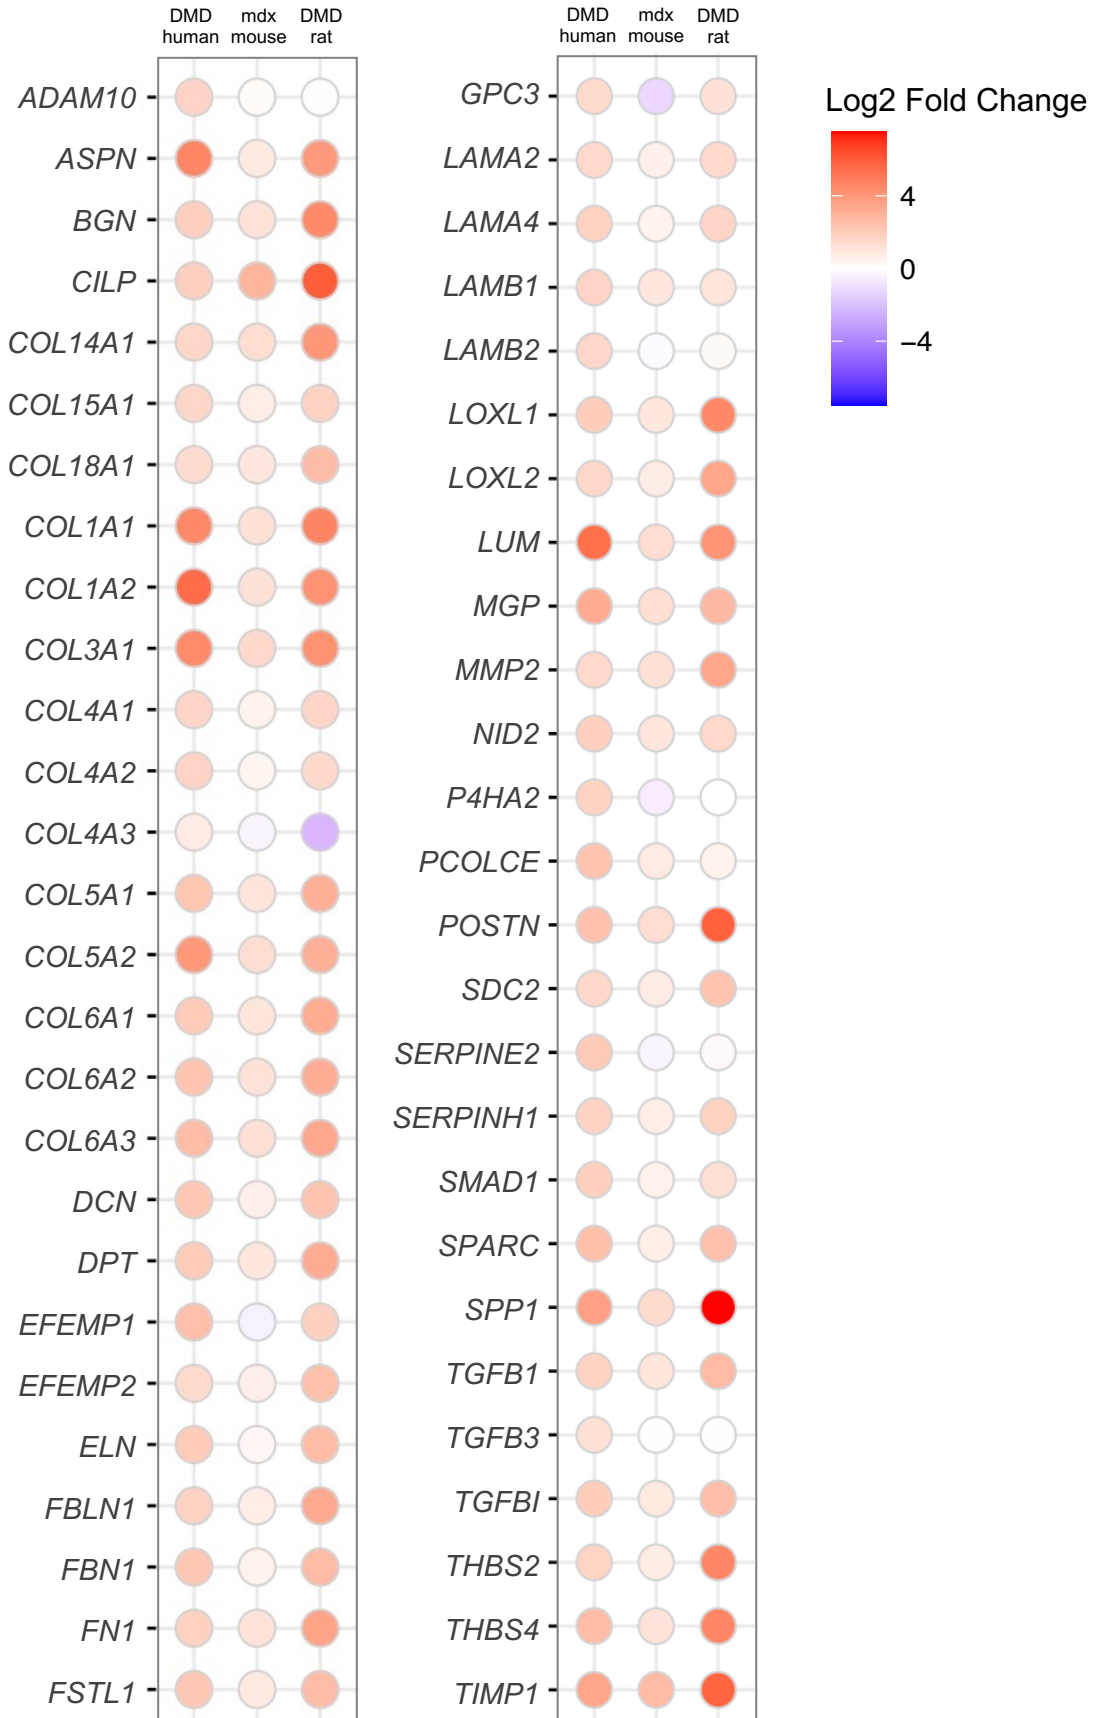

# Supplementary Figure 8

B

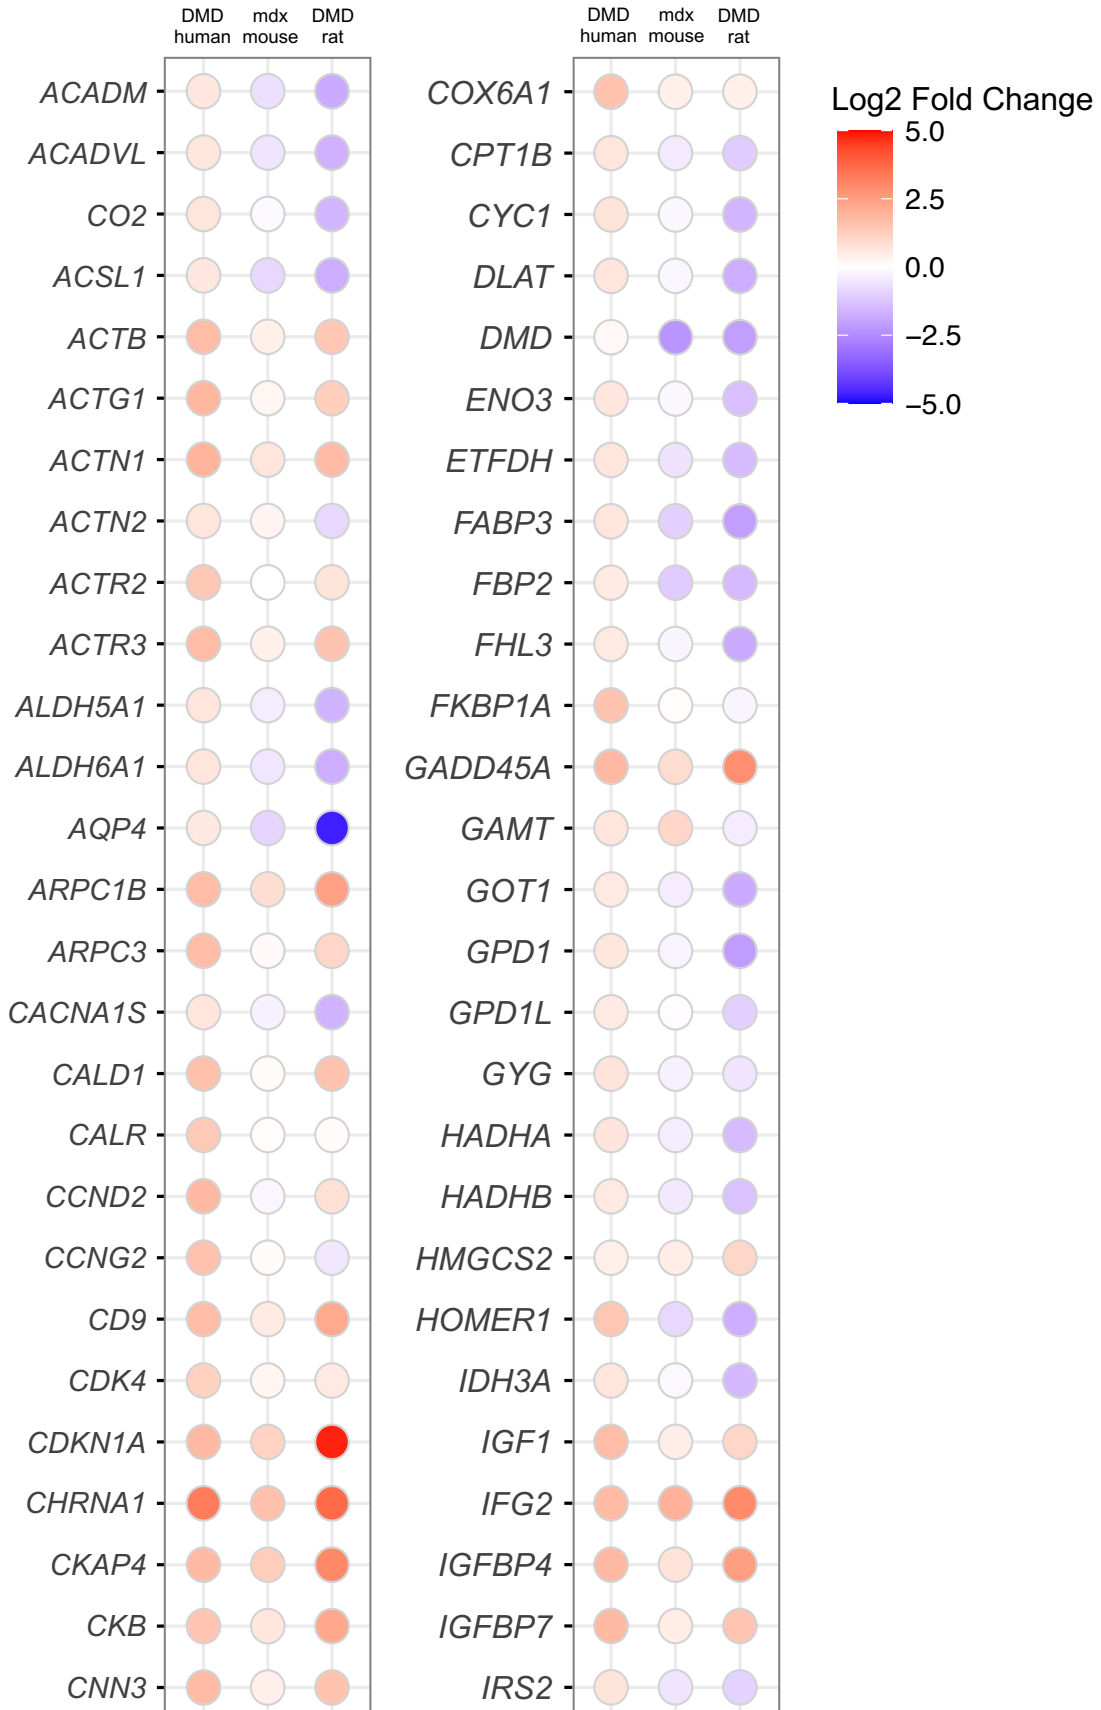

# Supplementary Figure 8

C

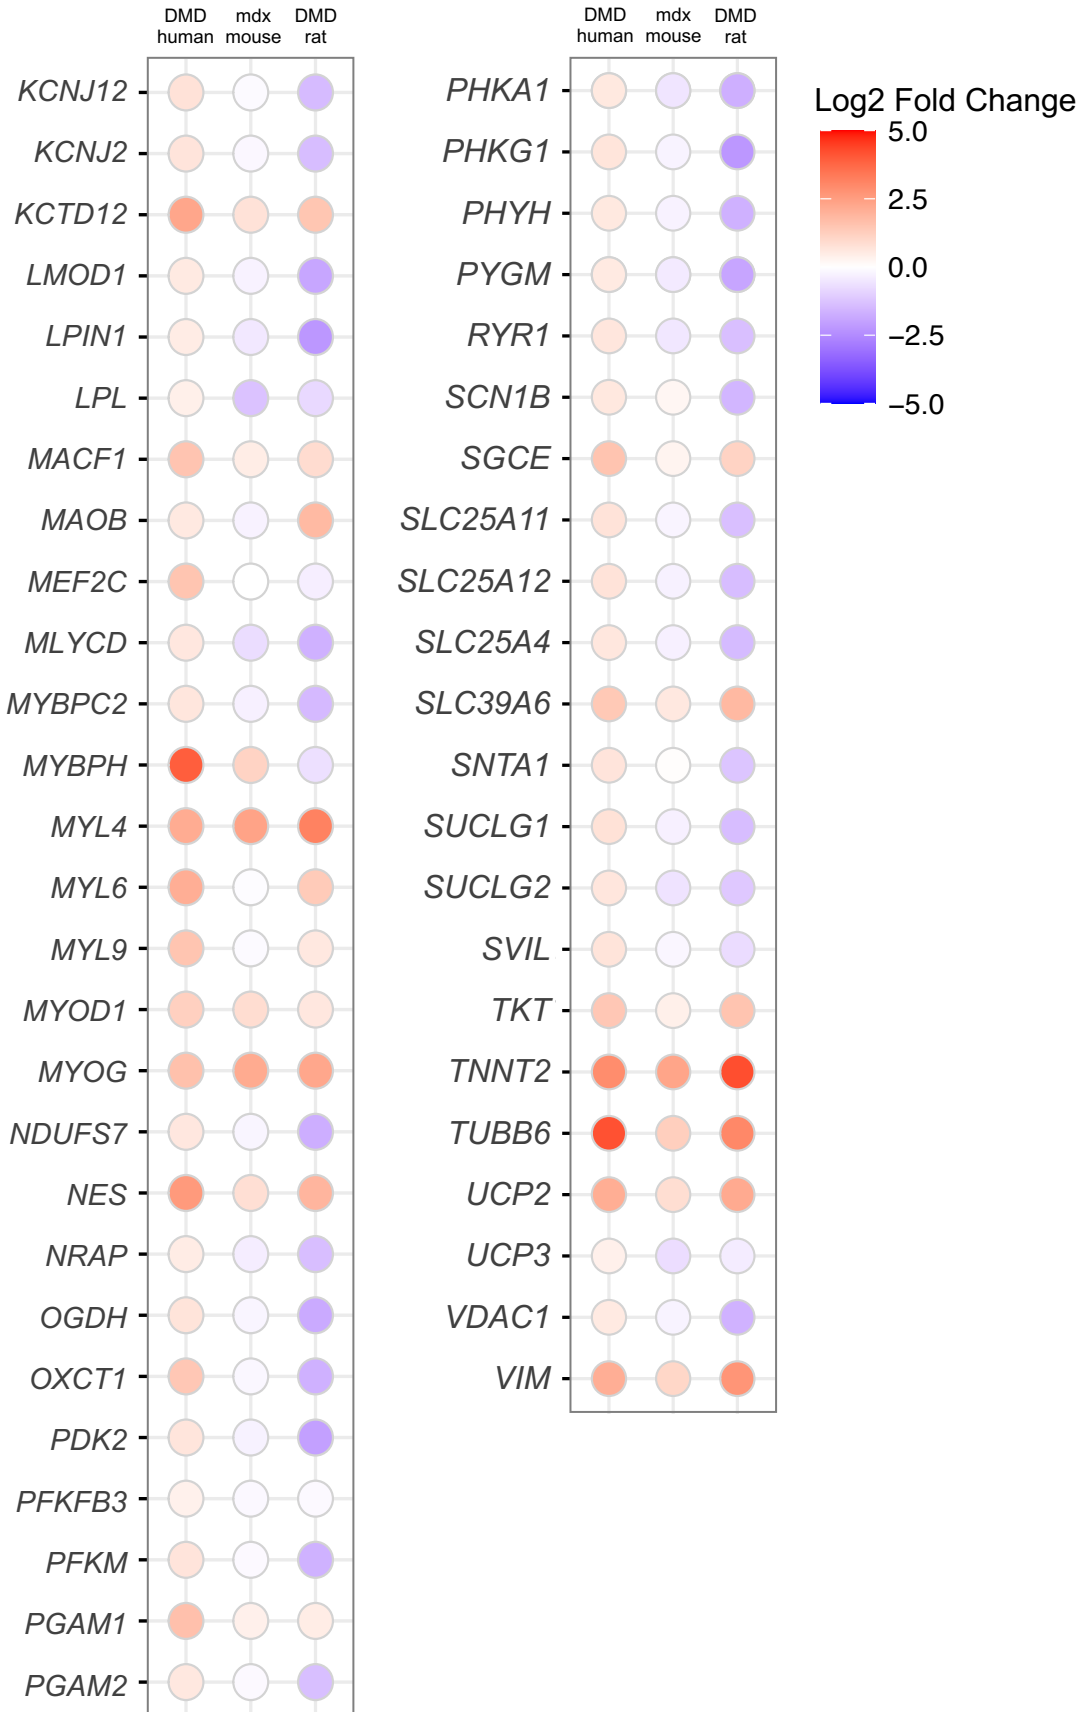

# Supplementary Figure 8

D

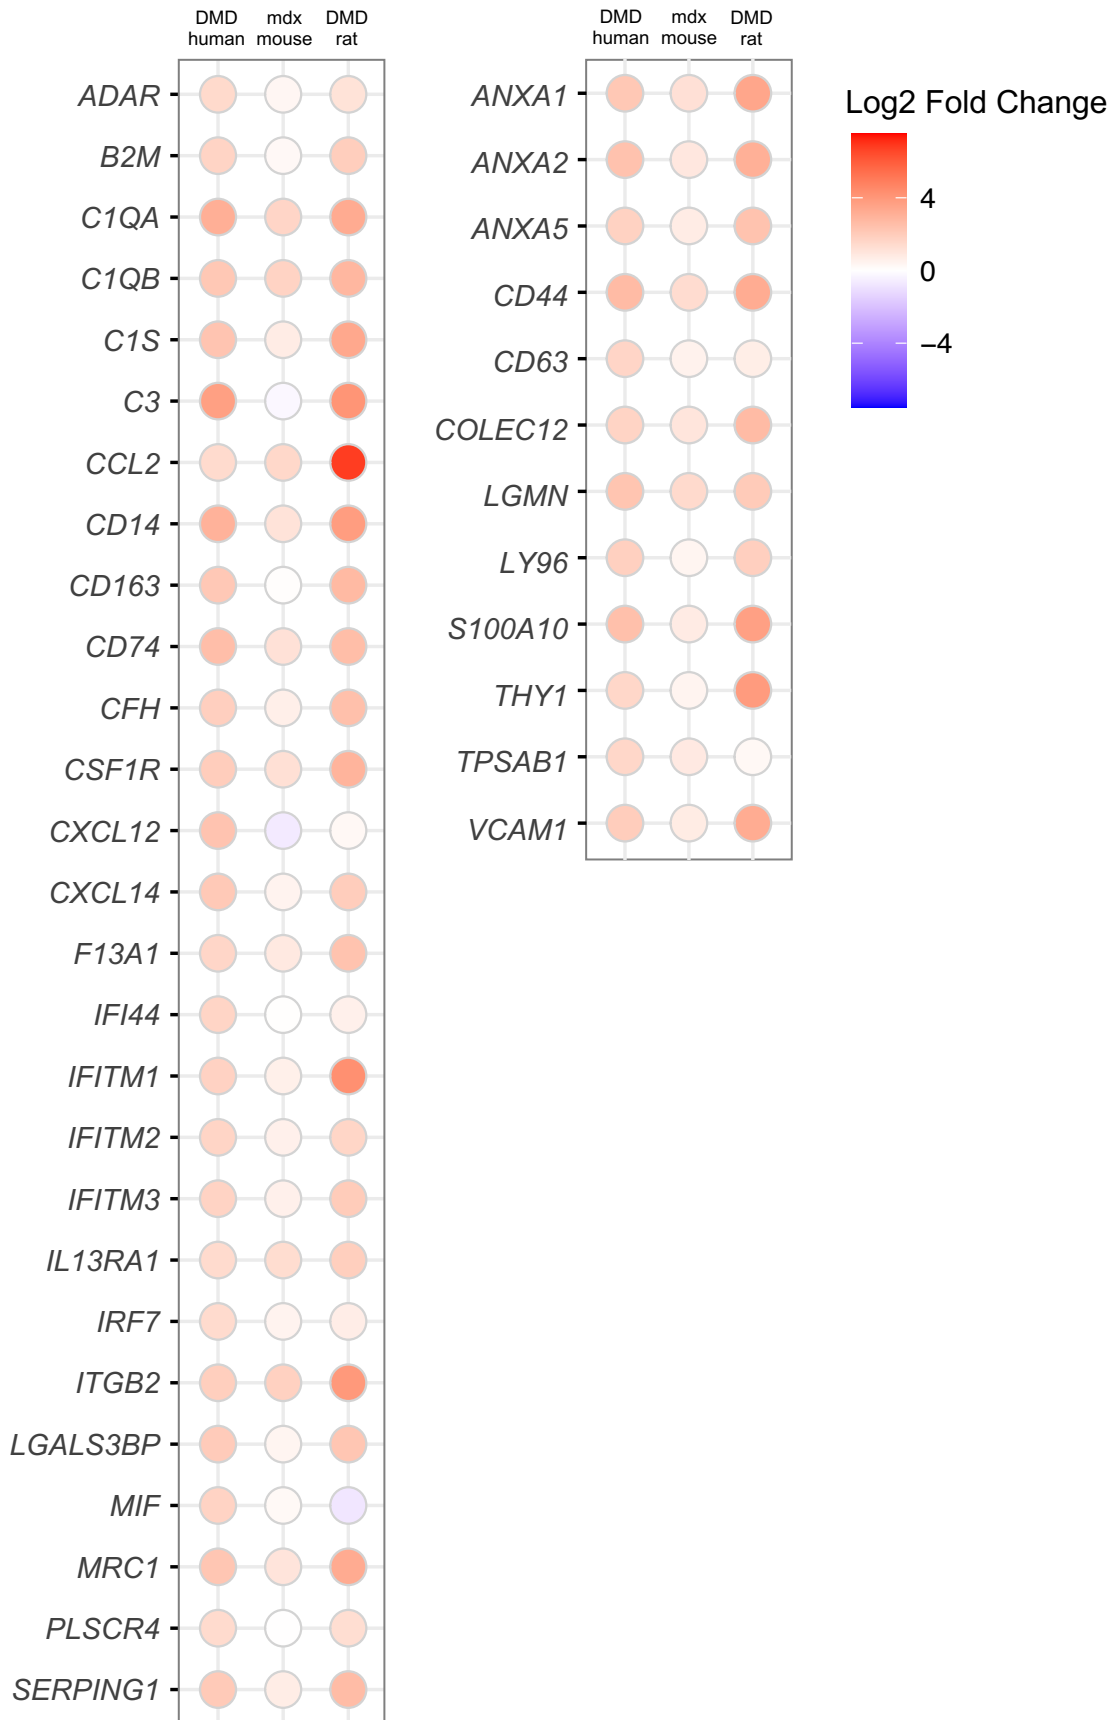

# Supplementary Figure 9

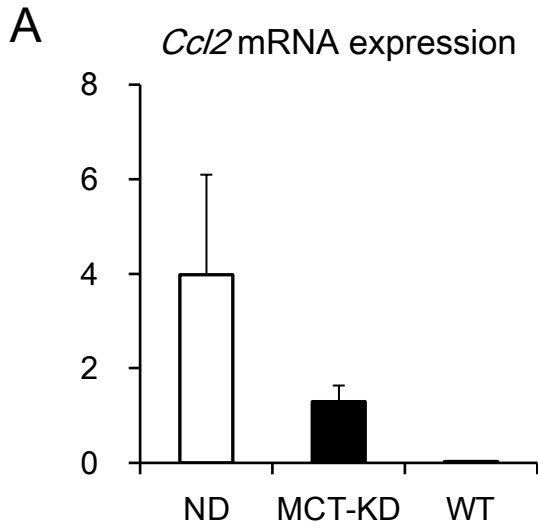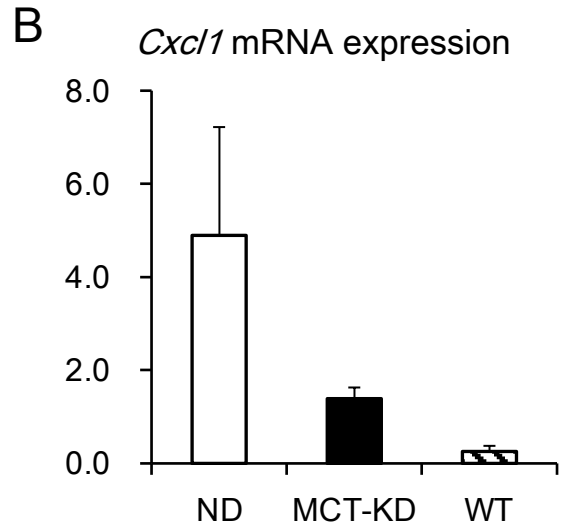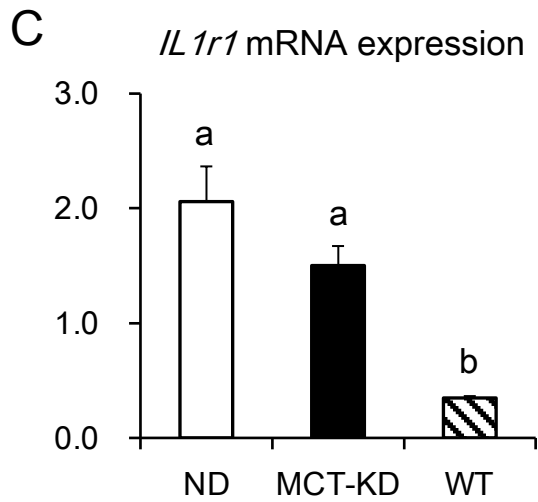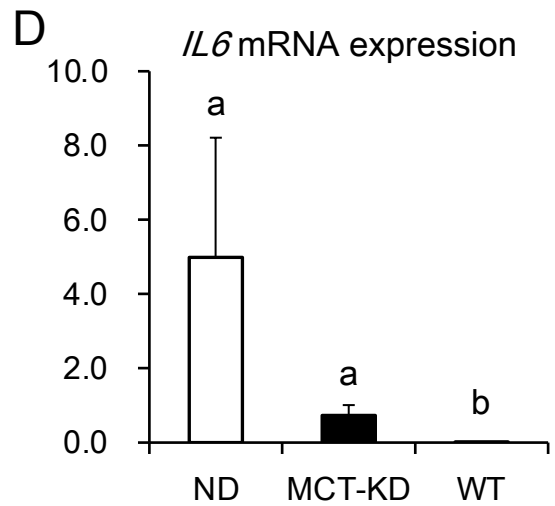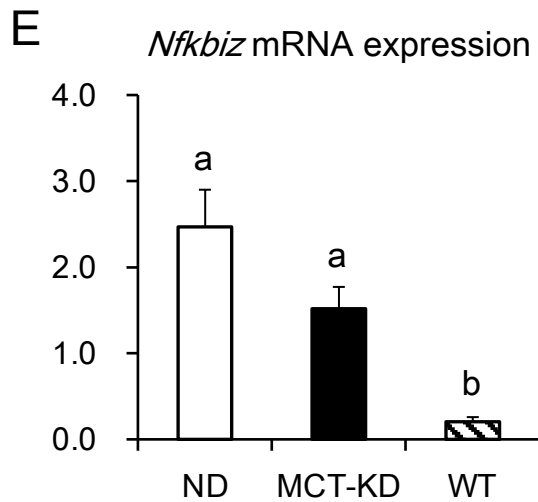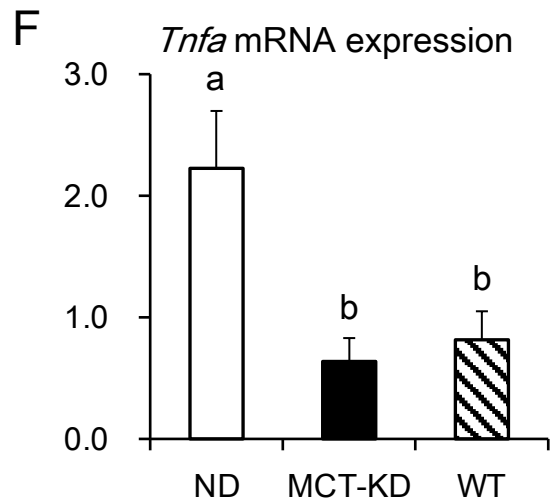

# Supplementary Figure 10

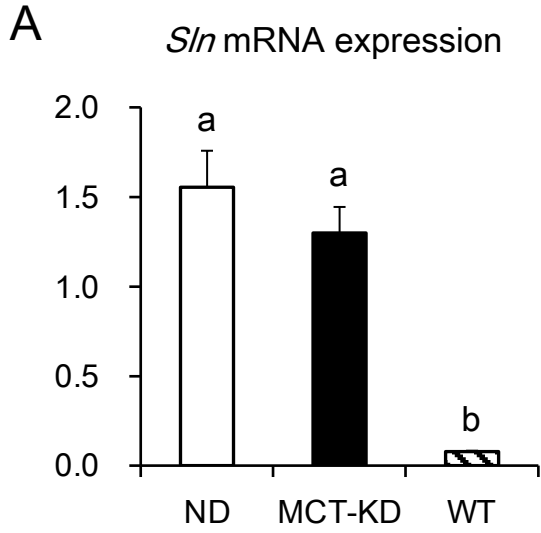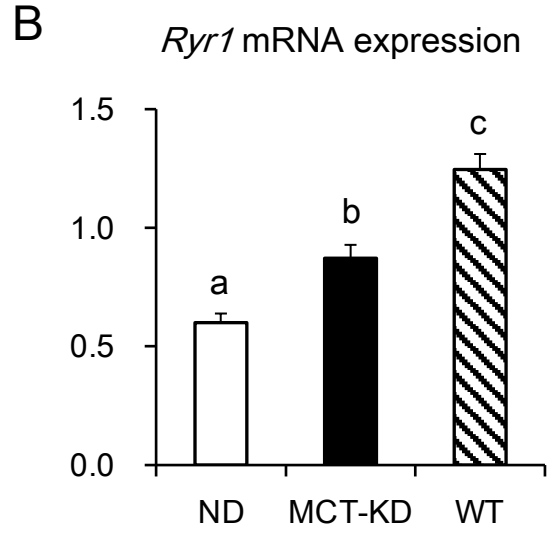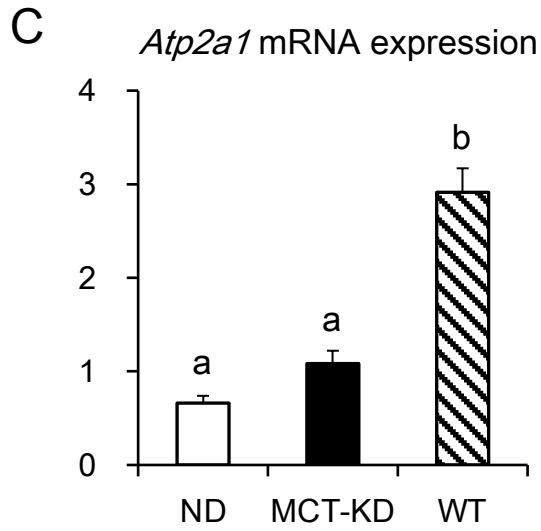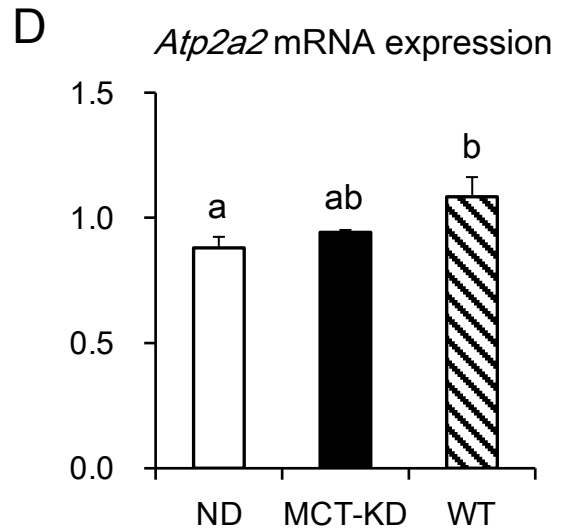

# Supplementary Figure 11

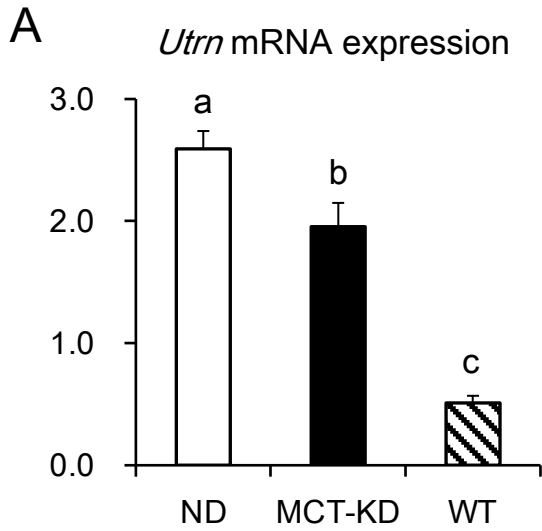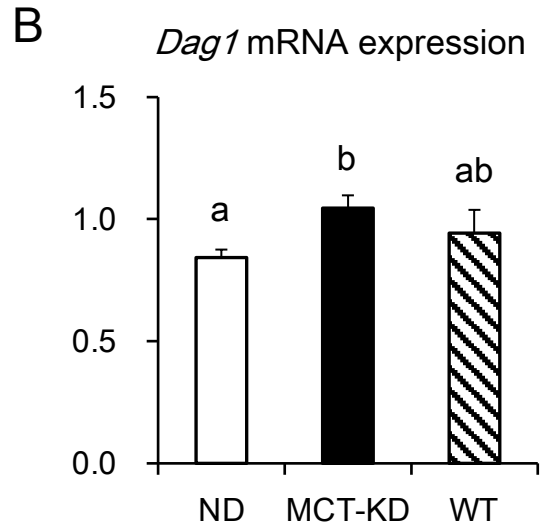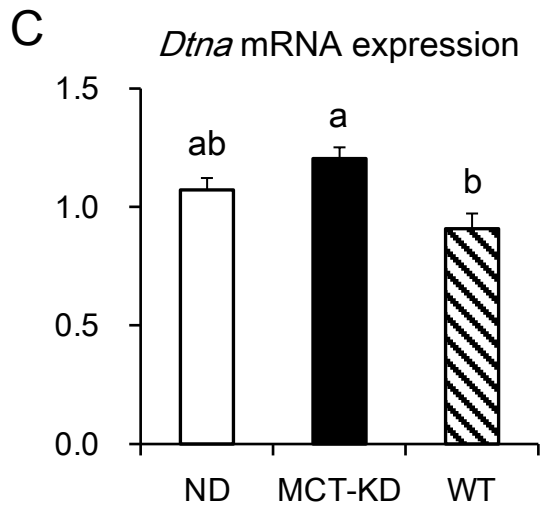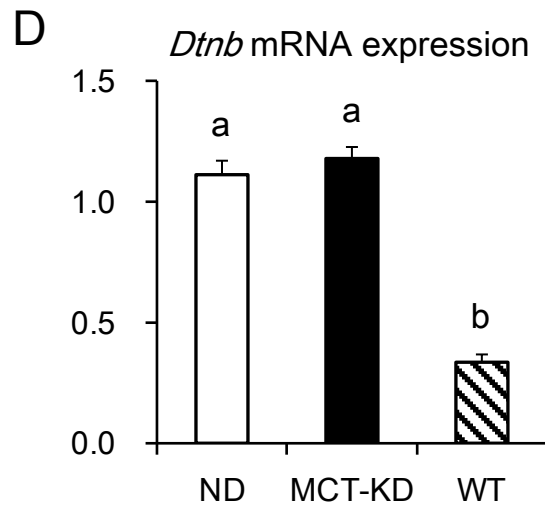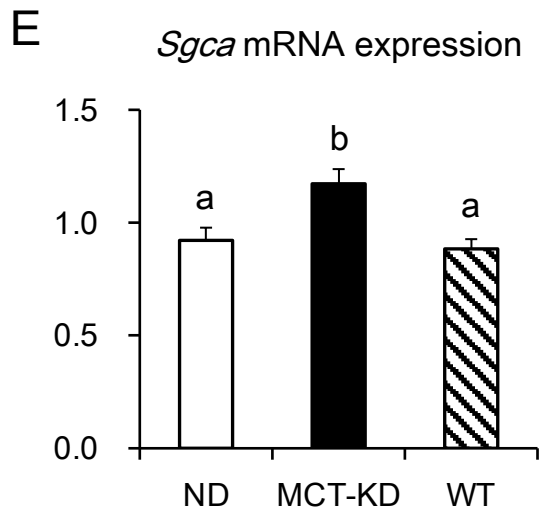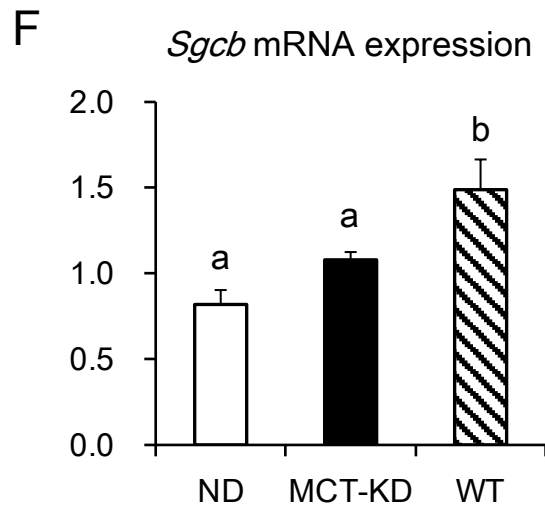

# Supplementary Figure 11

G

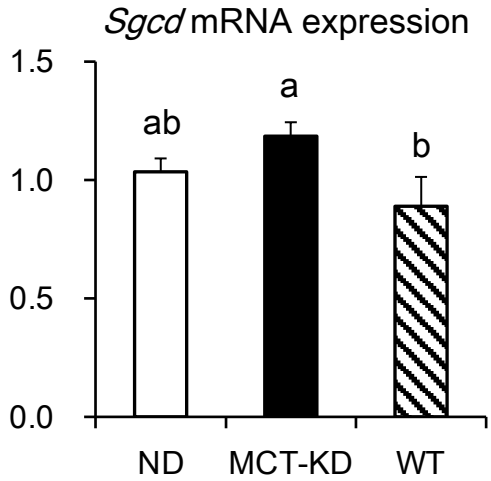

H

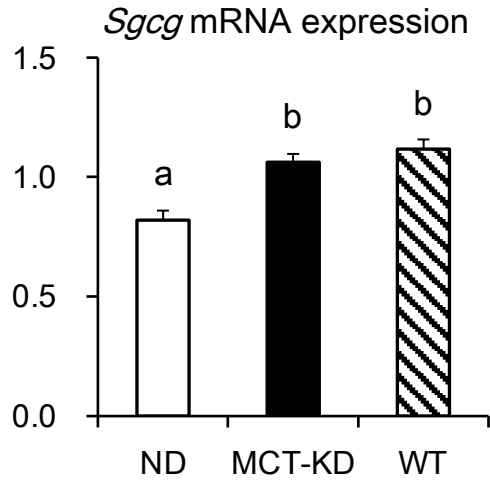

Supplement: mmc3.pdf [file mmc3.pdf]
